# Supplementary material for: The Ionic Product of Water in the Eye of the Quantum Cluster Equilibrium
Source: MDPI journal article supplement (doi:10.3390/molecules27041286), 2022-02-14
Supplement: s1 [file s1]

# **Supplementary Materials: The Ionic Product of Water in the Eye of the Quantum Cluster Equilibrium**

**Barbara Kirchner, Johannes Ingenmey, Michael von Domaros and Eva Perlt**

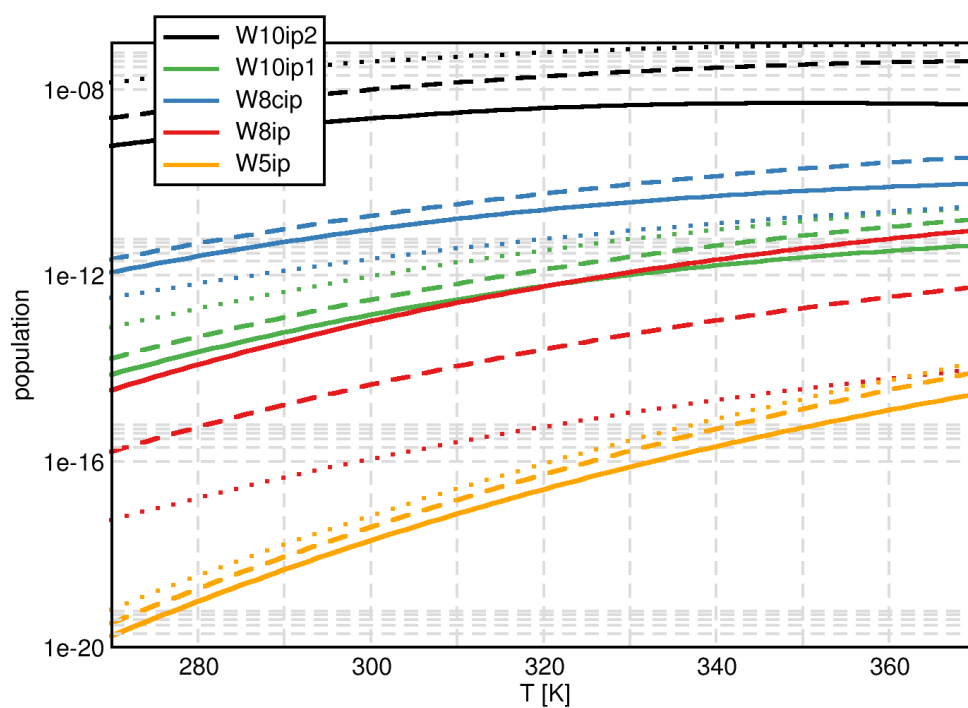

**Figure S1.** Temperature dependence of the monomer-normalized populations of the ion pair clusters. The y-axis shows, on logarithmic scale, the data for the B3LYP/D3/gCP method, using standard QCE (solid line), mRRHO50 (dashed line), and mRRHO100 (dotted line).

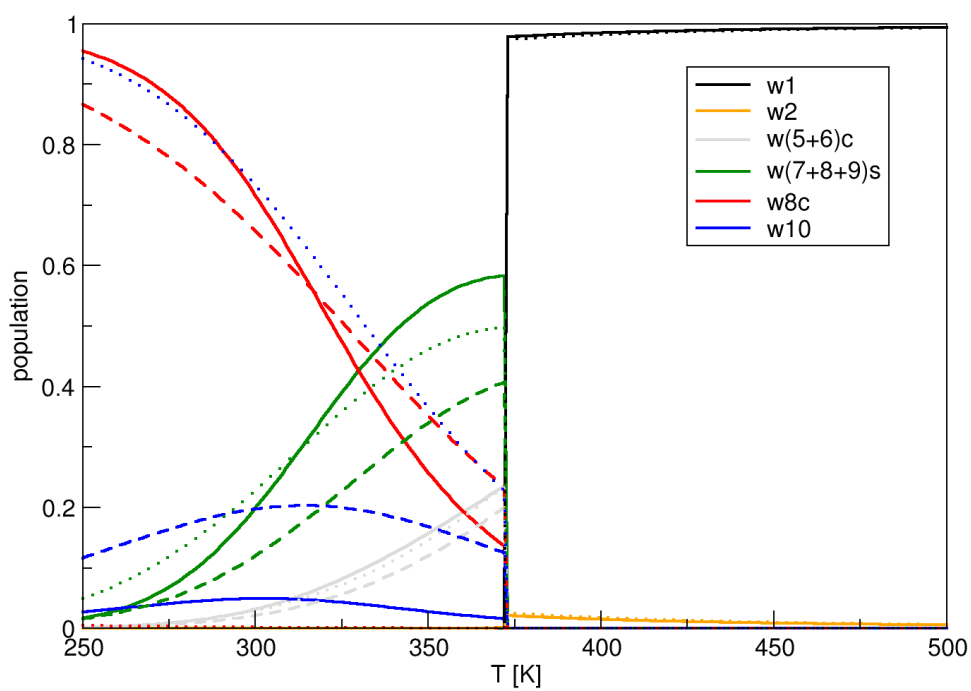

**Figure S2.** Temperature dependence of the monomer-normalized populations of the regular clusters, showing B3LYP/D3/gCP data as a representative example. Solid lines: conventional QCE, dashed lines: mRRHO50, and dotted lines: mRRHO100.

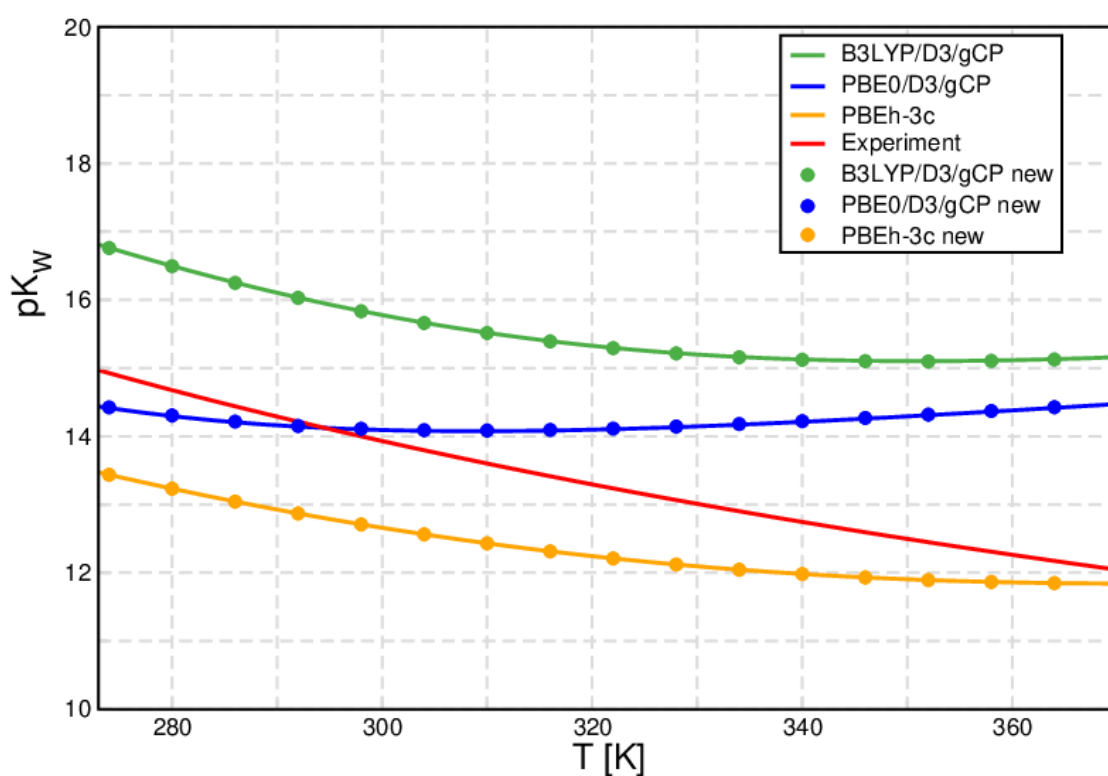

**Figure S3.** Temperature dependence of the negative logarithm of the ionic product,  $pK_W$ . Comparing results from our previous study [1] (lines) and to those obtained here, using the novel parameter optimization algorithm (circles) as well as experimental [2] values. The perfect agreement of both calculations underline the reliability and reproducibility of QCE data as well as numerical stability and robustness of the Peacemaker code. [3–5]

**Table S1:** Low lying vibrational modes for selected clusters shown in Figures 1 and 2 in the manuscript for the B3LYP/D3/gCP method.

| cluster       | $\tilde{\nu} < 50 \text{ cm}^{-1}$ |                         | $50 < \tilde{\nu} < 100 \text{ cm}^{-1}$ |                         |
|---------------|------------------------------------|-------------------------|------------------------------------------|-------------------------|
| <b>W5p</b>    | 11.54                              |                         | 64.19                                    | 96.24                   |
| <b>W5c</b>    | 22.10                              | 44.74                   | 69.48                                    | 73.14                   |
| <b>W6c</b>    | 30.11                              | 31.19                   | 50.12<br>55.06                           | 50.20<br>91.88          |
| <b>W7</b>     | 16.92<br>36.45                     | 19.75                   | 58.33<br>66.96                           | 59.11<br>94.02          |
| <b>W8p</b>    | 26.41<br>37.61                     | 34.03<br>42.44          | 50.80<br>62.19<br>97.74                  | 58.20<br>88.38          |
| <b>W8b</b>    | 27.34<br>36.73                     | 30.47<br>45.72          | 50.44<br>84.51                           | 82.76<br>86.98          |
| <b>W8c</b>    | —                                  |                         | 78.33<br>82.33<br>84.95                  | 80.62<br>84.83          |
| <b>W9</b>     | 13.87<br>27.83<br>43.89            | 21.09<br>42.54<br>47.49 | 57.64<br>73.91<br>88.84                  | 70.68<br>78.99          |
| <b>W10</b>    | —                                  |                         | 60.65<br>65.12<br>69.34<br>76.26         | 61.08<br>65.79<br>72.55 |
| <b>W5ip</b>   | —<br>38.85                         | 39.38                   | 90.71<br>55.85                           | 55.90                   |
| <b>W8ip</b>   | 39.66                              |                         | 85.43<br>89.36                           | 85.51                   |
| <b>W8cip</b>  | —                                  |                         | 86.32<br>97.50                           | 86.75                   |
| <b>W10ip1</b> | 22.31                              | 44.28                   | 58.79<br>69.58<br>84.72                  | 67.54<br>80.24<br>98.85 |
| <b>W10ip2</b> | —                                  |                         | 65.69<br>75.12<br>84.17                  | 69.90<br>80.80<br>96.46 |

**Table S2:** Temperatures of phase transition,  $T^*$ , in K for different pressures,  $P$ , in bar, different methods and different cutoff values for the mRRHO approach (a dash indicates the harmonic approximation) determined according to Ref. [6]. Experimental values from Ref. [7].

| mRRHO    | B3LYP/D3/gCP |        |        | PBE0/D3/gCP |        |        | PBEh-3c |        |        | Exp    |
|----------|--------------|--------|--------|-------------|--------|--------|---------|--------|--------|--------|
|          | —            | 50     | 100    | —           | 50     | 100    | —       | 50     | 100    |        |
| 0.095898 | 320          | 322    | 323    | 320         | 322    | 322    | 322     | 324    | 325    | 318.15 |
| 0.12344  | 325          | 327    | 327    | 325         | 326    | 327    | 327     | 329    | 329    | 323.15 |
| 0.15752  | 330          | 331    | 332    | 330         | 330    | 331    | 332     | 333    | 334    | 328.15 |
| 0.19932  | 334          | 336    | 337    | 334         | 336    | 336    | 336     | 338    | 338    | 333.15 |
| 0.25022  | 339          | 340    | 341    | 339         | 340    | 341    | 341     | 342    | 343    | 338.15 |
| 0.31176  | 344          | 345    | 346    | 344         | 345    | 345    | 345     | 347    | 347    | 343.15 |
| 0.38563  | 349          | 350    | 351    | 349         | 350    | 350    | 350     | 351    | 351    | 348.15 |
| 0.47373  | 353          | 354    | 355    | 354         | 354    | 354    | 355     | 356    | 356    | 353.15 |
| 0.57815  | 358          | 359    | 360    | 359         | 359    | 359    | 359     | 360    | 360    | 358.15 |
| 0.70117  | 363          | 363    | 364    | 364         | 363    | 363    | 364     | 365    | 364    | 363.15 |
| 0.84529  | 368          | 368    | 369    | 368         | 368    | 368    | 368     | 369    | 369    | 368.15 |
| 1.01325  | 373.15       | 373.15 | 373.15 | 373.15      | 373.15 | 373.15 | 373.15  | 373.15 | 373.15 | 373.15 |
| 1.2079   | 377          | 377    | 378    | 378         | 377    | 377    | 377     | 377    | 377    | 378.15 |
| 1.4324   | 382          | 381    | 382    | 384         | 381    | 381    | 381     | 382    | 381    | 383.15 |
| 1.6902   | 387          | 386    | 387    | 387         | 386    | 386    | 386     | 386    | 385    | 388.15 |
| 1.9848   | 391          | 390    | 391    | 392         | 390    | 390    | 390     | 390    | 389    | 393.15 |
| 2.3201   | 396          | 395    | 396    | 397         | 395    | 394    | 395     | 394    | 394    | 398.15 |
| 2.7002   | 401          | 399    | 400    | 401         | 399    | 399    | 399     | 398    | 398    | 403.15 |
| 3.1293   | 405          | 404    | 405    | 406         | 404    | 403    | 403     | 402    | 402    | 408.15 |
| 3.6119   | 410          | 408    | 409    | 410         | 408    | 407    | 408     | 406    | 406    | 413.15 |
| 4.1529   | 415          | 412    | 414    | 415         | 412    | 412    | 412     | 411    | 410    | 418.13 |
| 4.7572   | 420          | 417    | 418    | 420         | 417    | 416    | 416     | 415    | 413    | 423.15 |

1. Perlt, E.; von Domaros, M.; Kirchner, B.; Ludwig, R.; Weinhold, F. Predicting the ionic product of water. *Sci. Rep.* **2017**, *7*, 1–10.
2. Marshall, W.L.; Franck, E.U. Ion product of water substance, 0-1000 C, 1-10,000 bars. New International Formulation and its background. *J. Phys. Chem. Ref. Data* **1981**, *10*, 295–304.
3. Kirchner, B. Cooperative versus dispersion effects: What is more important in an associated liquid such as water? *J. Chem. Phys.* **2005**, *123*, 204116.
4. Kirchner, B.; Spickermann, C.; Lehmann, S.B.; Perlt, E.; Langner, J.; von Domaros, M.; Reuther, P.; Uhlig, F.; Kohagen, M.; Brüssel, M. What can clusters tell us about the bulk?: Peacemaker: Extended quantum cluster equilibrium calculations. *Comput. Phys. Commun.* **2011**, *182*, 1428–1446.
5. von Domaros, M.; Perlt, E.; Ingenmey, J.; Marchelli, G.; Kirchner, B. Peacemaker2: Making clusters talk about binary mixtures and neat liquids. *SoftwareX* **2018**, *7*, 356–359.
6. Weinhold, F. Quantum cluster equilibrium theory of liquids: Illustrative application to water. *J. Chem. Phys.* **1998**, *109*, 373–384.
7. Haynes, W.M. *CRC Handbook of Chemistry and Physics*; CRC press: Boca Raton, Florida, 2014.
